# Supplementary material for: Diagnostik und Management von Patient*innen mit erblichen Netzhautdegenerationen in Deutschland
Source: Springer Nature journal article supplement (doi:10.1007/s00347-023-01902-9), 2023-08-15
Supplement: MOESM1 [file 25925182]

**Zusätzliche Materialien: Diagnostik und Management von Patient\*innen mit erblichen Netzhautdegenerationen in Deutschland - Ergebnisse einer bundesweiten Umfrage an universitären und nicht-universitären Augenkliniken sowie Schwerpunktpraxen**

**Abb. S1. Fragebogen**

Alle Fragen und Antwortmöglichkeiten sind in diesem Dokument aufgeführt. Der Online-Fragebogen nutzte Filter, sodass bestimmte Fragen nur durch das Auswählen gewisser vorangehender Antworten präsentiert wurden.

**01**

**Wo arbeiten Sie?**

*Entsprechendes bitte auswählen.*

- Universitätsklinik
- Städtische Klinik
- Praxisklinik mit Schwerpunkt erbliche Augenerkrankungen
- Keine Angabe

---

**02**

**In welchem Bundesland liegt Ihre Einrichtung?**

*Bitte Bundesland angeben.*

---

**03**

**Welche Funktion erfüllen Sie in Ihrer Einrichtung?**

*Entsprechendes bitte auswählen.*

- Direktorin/Direktor bzw. Leiterin/Leiter der Einrichtung
- Oberärztin/Oberarzt bzw. Partnerin/Partner der Einrichtung
- Fachärztin /Facharzt
- Assistenzärztin/Assistenzarzt
- Studienassistentin/Studienassistent
- Medizinische Fachangestellte/ Medizinischer Fachangestellter
- Andere: Bitte geben Sie Ihre Funktion an.
- Keine Angabe

**04**

**Wie viele ambulante Neupatienten betreut Ihre Einrichtung pro Quartal?**

*Entsprechendes bitte auswählen.*

- <500
- 500-1000
- 1000-2000
- 2000-5000
- 5000-10000
- >10000
- Weiß nicht
- Keine Angaben

---

**05**

**In der neuen Weiterbildungsordnung für die Augenheilkunde wurde ein Weiterbildungsblock „Genetik“ hinzugefügt. Wird dies Auswirkungen auf die Weiter- und Fortbildungen in Ihrer Einrichtung haben?**

*Entsprechendes bitte auswählen.*

- Ja
- Nein
- Weiß nicht
- Keine Angabe

*Wenn **Ja** → Frage **06** des Fragebogens beantworten (sonst überspringen)*

*Wenn **Nein** → Frage **07** des Fragebogens überspringen*

*Wenn **Weiß nicht** oder **Keine Angabe** → Fragen **06, 07** des Fragebogens überspringen*

---

**06**

**Welche Maßnahmen werden bei Ihnen umgesetzt?**

*Entsprechendes bitte auswählen (Mehrfachauswahl).*

- Weiterbildungseinheit in der Humangenetik bzw. an genetischer Beratungsstelle
- Obligate Teilnahme an ophthalmologenetischen Fortbildungsveranstaltungen
- Andere: Bitte geben Sie die Maßnahme an.

*Wenn **Obligate Teilnahme an ophthalmologenetischen Fortbildungsveranstaltungen** → Frage **07** des Fragebogens beantworten (sonst überspringen)*

**07**

**Welche ophthalmogenetische Fortbildungsveranstaltung wird besucht?**

- Entsprechendes bitte auswählen (Mehrfachauswahl).
  - 72 Std. Kurs zur Qualifikation zur fachgebundenen genetischen Beratung (Akademie Humangenetik, Gesellschaft für Humangenetik (GfH))
  - E-Campus, DOG: Genetik-Kurs: „Neue Anforderungen an den Augenarzt in der Diagnostik erblicher Netzhauterkrankungen im Zeitalter der Gentherapie“.
  - Andere: Bitte geben Sie die Veranstaltung an.
  - Weiß nicht
- 

**08**

**Wie bleiben Sie bezüglich seltener Augenerkrankungen „up-to-date“?**

- Entsprechendes bitte auswählen (Mehrfachauswahl).
  - Leitlinien
  - Eigene Forschung
  - Journals
  - Externe Fortbildungen
  - Fortbildungen in domo
  - Andere: Bitte geben Sie die Maßnahme an.
  - Weiß nicht
- 

**09**

**Empfehlen Sie IRD-Patienten Patientenvereinigungen?**

**Entsprechendes bitte auswählen.**

- Ja
- Nein
- Weiß nicht

Wenn **Ja** → Frage 10 des Fragebogens beantworten (sonst überspringen)

---

**10**

**Welche Selbsthilfe-Vereinigung empfehlen Sie?**

- Entsprechendes bitte auswählen. (Mehrfachauswahl).
  - Pro Retina e.V.
  - Deutscher Blinden- und Sehbehindertenverband
  - Andere: Bitte geben Sie die Vereinigung an.
- 

**11**

**Weisen Sie Patienten auf weitergehende Unterstützungsmöglichkeiten hin?**

Entsprechendes bitte auswählen. (Mehrfachauswahl).

- Psychosoziale Beratung
  - Blindengeld
  - Ausstattung der Wohnung
  - Technische Hilfsmittel (Smartphones etc.)
  - Optische Hilfsmittel
  - Krankenhaussozialdienst
  - Andere: Bitte geben Sie die Unterstützungsmaßnahme an.
  - Keine
- 

## 12

Ist in Ihrer Einrichtung mindestens eine auf IRD spezialisierte Ärztin/ein spezialisierter Arzt tätig?

Entsprechendes bitte auswählen.

- Ja
- Nein

Wenn **Ja** → Frage 13 des Fragebogens beantworten (sonst überspringen)

Wenn **Nein** → Frage 14 des Fragebogens beantworten (sonst überspringen)

---

## 13

Bieten Sie eine Sprechstunde speziell für erbliche Netzhauterkrankungen an?

Entsprechendes bitte auswählen.

- Ja
- Nein

Wenn **Ja** → Frage 15 des Fragebogens beantworten (sonst überspringen)

Wenn **Nein** → Frage 14 des Fragebogens beantworten (sonst überspringen)

---

## 14

Betreut Ihre Einrichtung dennoch Patienten mit erblichen Netzhauterkrankungen?

Entsprechendes bitte auswählen.

- Ja
- Nein

Wenn **Nein** → direkt Beendigung

Wenn **Ja** → Frage 15 des Fragebogens beantworten (sonst überspringen)

**15**

**Wie sieht die Behandlung von Patienten mit IRD aus?**

*Entsprechendes bitte auswählen.*

- Initiale Behandlung in eigener Einrichtung, dann Weiterüberweisung
  - Patienten erhalten auch weitere Kontrollen in eigener Einrichtung
- 

**16**

**Wie viele IRD-Patienten werden momentan insgesamt in Ihrer Einrichtung betreut?**

*Entsprechendes bitte auswählen.*

- Keine
  - <10
  - 10-19
  - 20-49
  - 50-99
  - 100-199
  - 200-499
  - 500-999
  - ≥1000
  - Weiß nicht
  - Keine Angabe
- 

**17**

**Wie viele neue IRD-Patienten betreuen Sie pro Jahr in Ihrer Einrichtung?**

*Entsprechendes bitte auswählen.*

- Keine
  - <10
  - 10-19
  - 20-49
  - 50-99
  - 100-199
  - 200-499
  - 500-999
  - >1000
  - Weiß nicht
- 

**18**

**Welche Basisdiagnostik und spezielle Diagnostik erhalten IRD-Patienten in Ihrer Einrichtung?**

Entsprechendes bitte auswählen (Mehrfachauswahl).

- Visus
  - Refraktometrie
  - Perimetrie
  - Fundus-Fotografie
  - SD-OCT/SS-OCT
  - Fundusautofluoreszenz (FAF)
  - Elektrophysiologie (ERG, EOG, VEP)
  - Full-Field-Stimulus: Nur Weiß
    - Blau, Rot
    - Blau, Rot, Weiß
  - Dunkeladaptometrie
  - Andere: Bitte geben Sie die Untersuchung an.
- 

19

**Wie lange dauert es durchschnittlich bis IRD-Patienten einen Termin in Ihrer Klinik erhalten?**

Entsprechendes bitte auswählen.

- < 4 Wochen
  - 1-2 Monate
  - 3-4 Monate
  - 5-6 Monate
  - ≥ 6 Monate
  - Weiß nicht
- 

20

**Ist eine Datenbank eigens für IRD-Patienten in Ihrer Einrichtung verfügbar?**

Entsprechendes bitte auswählen.

- Ja, wird genutzt
- Ja, wird nicht genutzt
- Nein
- Weiß nicht

Wenn **Ja, wird genutzt** oder **Ja, wird nicht genutzt** → Frage 21 des Fragebogens beantworten (sonst überspringen)

Wenn **Nein** oder **Weiß nicht** → direkt zu Frage 23 springen

---

21

**Wie ist Ihre Datenbank realisiert?**

Entsprechendes bitte auswählen.

- Extern, webbasierte Lösung
  - Lokal, Excel etc.
  - Andere: Bitte geben Sie die Art an.
  - Weiß nicht
- 

## 22

### Wie viele IRD-Patienten sind in Ihrer Datenbank hinterlegt?

Entsprechendes bitte auswählen.

- <100
  - 100-499
  - 500-1999
  - 2000-4999
  - ≥5000
  - Weiß nicht
- 

## 23

### Wie werden Patienten mit Verdacht auf IRD in Ihrer Einrichtung vorstellig bzw. welcher Facharzt überweist?

Bitte geben Sie geschätzte Prozentzahlen an (in Summe bitte 100%).

- Selbstvorstellung:
  - Allgemeinmediziner:
  - Kinderarzt (niedergelassen oder in Klinik):
  - Niedergelassener Augenarzt:
  - Auf Netzhaut spezialisierter, niedergelassener Augenarzt:
  - Humangenetiker/ genetische Beratungsstelle:
  - Andere ophthalmologische Klinik:
  - Andere: Bitte geben Sie eine Prozentzahl an:
- 

## 24

### Wie alt sind Patienten mit Verdacht auf IRD, wenn sie in Ihrer Einrichtung vorstellig werden?

Bitte geben Sie geschätzte Prozentzahlen an (in Summe bitte 100%).

- <3 Jahre:
- Vorschulalter (3-5 Jahre):
- Grundschulalter (6-10 Jahre):
- Weiterführende Schule (11-17 Jahre):
- Junge Erwachsene (18-30 Jahre):
- Erwachsene (≥30Jahre):

**25**

**Was ist die durchschnittliche Zeit zwischen Erstvorstellung und finaler klinischer Diagnose?**

*Entsprechendes bitte auswählen.*

- < 4 Wochen
- Monate
- Jahre
- Weiß nicht

Wenn **Monate** → Frage 26 des Fragebogens beantworten (sonst überspringen)

Wenn **Jahre** → Frage 27 des Fragebogens beantworten (sonst überspringen)

---

**26**

**Wie viele Monate im Mittel?**

Bitte geben Sie die geschätzte Anzahl an Monaten an.

---

**27**

**Wie viele Jahre im Mittel?**

*Bitte geben Sie die geschätzte Anzahl an Jahren an.*

---

**28**

**Werden Ihre IRD-Patienten genetisch getestet?**

*Entsprechendes bitte auswählen.*

- Ja
- Nein

Wenn **Ja** → Frage 30 des Fragebogens beantworten (sonst überspringen)

Wenn **Nein** → Frage 29 des Fragebogens beantworten (sonst überspringen)

---

**29**

**Wieso veranlasst Ihre Einrichtung keine genetische Testung der Patienten?**

*Entsprechendes bitte auswählen. (Mehrfachauswahl).*

- Vorgaben der Klinikleitung



- Kein praktischer Nutzen für die Patienten
- Zu hohe Kosten
- Zu hoher Zeitaufwand
- Überweisung an humangenetische Beratungsstelle
- Andere: Bitte geben Sie die Gründe an.
- Weiß nicht

Wenn **jegliche Antwort** → Fragen 31, 32 des Fragebogens überspringen

---

### 30

#### Wo wird die genetische Testung durchgeführt?

Entsprechendes bitte auswählen.

- Vor Ort
- Auswärts
- Weiß nicht

Wenn **Vor Ort** → Frage 32 des Fragebogens beantworten (sonst überspringen)

Wenn **Auswärts** → Frage 31 des Fragebogens beantworten (sonst überspringen)

---

### 31

#### Mit wie vielen zertifizierten molekulargenetischen Laboren arbeiten Sie zusammen?

Entsprechendes bitte auswählen.

- 1
- 2-3
- 4-5
- ≥5
- Weiß nicht

Wenn **jegliche Antwort** und **Überspringen** → Frage 32 des Fragebogens beantworten (sonst überspringen)

---

### 32

#### Wie lange dauert es derzeit im Mittel, bis Sie das Ergebnis der genetischen Untersuchung erhalten?

Entsprechendes bitte auswählen.

- <2 Wochen
  - 2-4 Wochen
  - Monate
  - Weiß nicht
- 

### 33

**Bietet Ihre Einrichtung eine fachgebundene genetische Beratung an?**

*Entsprechendes bitte auswählen.*

- Ja
  - Nein
  - Weiß nicht
- 

**34**

**Wer übernimmt die genetische Beratung der IRD-Patienten?**

*Entsprechendes bitte auswählen. (Mehrfachauswahl).*

- Externes Fachzentrum
  - Andere Fachabteilung der Klinik (z.B. Humangenetik)
  - Mitarbeiter mit ophthalmogenetischer Zusatzqualifikation
  - Externer Augenarzt mit ophthalmogenetischer Zusatzqualifikation
  - Andere: Bitte geben Sie an, wer die Beratung durchführt.
  - Patienten erhalten keine genetische Beratung
  - Weiß nicht
- 

**35**

**Wie viele Ihrer IRD-Patienten wurden geschätzt genetisch getestet?**

*Entsprechendes bitte auswählen.*

- 0-20%
- 21-40%
- 41-60%
- 61-80%
- 81-100%
- Patienten erhalten keine Testung
- Weiß nicht

Wenn **Patienten erhalten keine Testung** und **Überspringen** → Fragen 36, 37 des Fragebogens überspringen

---

**36**

**Welche Art der genetischen Testung wird in der Regel durchgeführt?**

*Entsprechendes bitte auswählen (Mehrfachauswahl).*

- Whole Genome Sequencing
- Whole Exom Sequencing
- Medical Exom Sequencing
- IRD-spezifisches Gene Panel

- Diagnose bezogenes Sanger Sequencing
- Andere: Bitte geben Sie die Art der Testung an.

Wenn **IRD-spezifisches Gene-Panel** → Fragen 37 des Fragebogens beantworten (sonst überspringen)

---

### 37

**Welche Panels werden in Ihrer Einrichtung genutzt?**

*Entsprechendes bitte auswählen (Mehrfachauswahl).*

- LCA-Panel
  - RP-Panel
  - CRD-Panel
- 

### 38

**Wie viele Ihrer Patienten haben geschätzt eine molekulargenetische Diagnose erhalten?**

*Entsprechendes bitte auswählen.*

- 0-20%
  - 21-40%
  - 41-60%
  - 61-80%
  - 81-100%
  - Weiß nicht
- 

### 39

**In welcher Altersgruppe werden bei Ihnen die meisten IRD-Fälle diagnostiziert?**

*Bitte geben Sie geschätzte Prozentzahlen an (in Summe bitte 100%).*

- <3 Jahre:
  - 3-5 Jahre:
  - 6-10 Jahre:
  - 11-17 Jahre:
  - 18-30 Jahre:
  - ≥30 Jahre:
- 

### 40

**Wie testen Sie die Sehschärfe?**

*Entsprechendes bitte auswählen (Mehrfachauswahl).*

- ETDRS-Tafel
  - Snellen-Tafel
  - Landolt-Ringe
  - E-Haken
  - Teller® Acuity cards
  - Lea® Symbole
  - Lea® Symbole niedriger Kontrast
  - Pelli Robson Tafel
- 

**41**

**Wer fertigt die Augenhintergrund-Aufnahmen in Ihrer Einrichtung am häufigsten an?**

*Entsprechendes bitte auswählen.*

- Ärztin/Arzt
  - Fotografin/Fotograf
  - MFA/ Studienassistentin/Studienassistent
  - Andere:
  - Bitte geben Sie die Person an
  - Weiß nicht
- 

**42**

**Bieten Sie elektrophysiologische Untersuchungen an?**

*Entsprechendes bitte auswählen.*

- Ja
- Nein

*Wenn Ja → Frage 43 des Fragebogens beantworten (sonst überspringen)*

---

**43**

**Welche elektrophysiologische Untersuchung führen Sie bei IRD-Patienten durch?**

- Entsprechendes bitte auswählen (Mehrfachauswahl).
  - Ganzfeld-ERG
  - Multifokales-ERG
  - Elektrookulografie (EOG)
  - Visuell-evozierte-Potenziale
- 

**44**

**Welche Methode zur Gesichtsfeldtestung nutzen Sie?**

*Entsprechendes bitte auswählen (Mehrfachauswahl).*

- Statische Perimetrie
  - Kinetische Perimetrie
  - Funduskontrollierte Perimetrie
  - Weiß nicht
- 

#### 45

**Ist Ihre Einrichtung momentan oder war Ihre Einrichtung bis vor kurzem an klinischen Studien zum natürlichen Verlauf bei IRDs beteiligt?**

*Entsprechendes bitte auswählen.*

- Ja, eine hausinterne Studie
- Ja, eine multizentrische Studie
- Nicht involviert
- An Teilnahme interessiert

*Wenn **Ja, eine hausinterne Studie** und **Ja, eine multizentrische Studie** → Frage 46 des Fragebogens beantworten (sonst überspringen)*

*Wenn **An Teilnahme interessiert** → Frage 47 des Fragebogens beantworten (sonst überspringen)*

---

#### 46

**Welche Form der IRD wird/wurde untersucht?**

*Entsprechendes bitte auswählen (Mehrfachauswahl).*

- LHON
  - LCA
  - EOSRD
  - Chorioideremie
  - X-chromosomale Retinitis pigmentosa
  - Zapfen-Stäbchen-Degeneration
  - Achromatopsie
  - Morbus Stargardt
  - Usher-Syndrom
  - Andere: Bitte geben Sie die Erkrankung an.
- 

#### 47

**Welche Gene/Erkrankungen sollen untersucht werden/ werden untersucht?**

*Bitte geben Sie kurz an, welche Erkrankungen untersucht werden sollen.*

---

## 48

### Ist Ihre Einrichtung momentan oder war Ihre Einrichtung bis vor kurzem an klinischen genterapeutischen Studien für IRDs beteiligt?

Entsprechendes bitte auswählen.

- Ja, ist momentan beteiligt
- Ja, war vor kurzem beteiligt
- Nicht involviert
- An Teilnahme interessiert

Wenn **Ja ist momentan beteiligt** und **Ja, war vor kurzem beteiligt**  
→ Frage 49 des Fragebogens beantworten (sonst überspringen)

Wenn **An Teilnahme interessiert** → direkt zur Seite 53 springen

Wenn **Nicht involviert** → Fragen 49,50,51,52,53 des Fragebogens überspringen

---

## 49

### Welche erblichen Augenerkrankungen wurden/werden untersucht?

Entsprechendes bitte auswählen (Mehrfachauswahl).

- LHON
  - LCA
  - EOSRD
  - Chorioideremie
  - X-chromosomale Retinitis pigmentosa
  - Zapfen-Stäbchen-Degeneration
  - Achromatopsie
  - Morbus Stargardt
  - Usher-Syndrom
  - Andere: Bitte geben Sie die Erkrankung an
- 

## 50

### Welche Gene wurden/werden untersucht?

Entsprechendes bitte auswählen (Mehrfachauswahl).

- ABCA4
- CHM
- CEP290
- CNGA3
- CNGB3
- MYO7A
- RHO
- RPGR

- RPE65
  - Gen-unabhängig
  - USH2A
  - CRB1
  - Andere: Bitte geben Sie das Gen/die Gene an.
  - Weiß nicht
- 

**51**

**Hatte Ihre Einrichtung die Studienleitung inne?**

*Entsprechendes bitte auswählen.*

- Ja
  - Nein
  - Weiß nicht
- 

**52**

**Wollen Sie in Zukunft weitere Studien durchführen?**

*Entsprechendes bitte auswählen*

- Ja
- Nein
- Weiß nicht

*Wenn **Ja** → Frage 53 des Fragebogens beantworten (sonst überspringen)*

---

**53**

**Wenn ja, welche Gene/Erkrankungen sollen untersucht werden?**

*Bitte geben Sie an, welche Gene untersucht werden sollen.*

---

**54**

**Betreuen Sie in Ihrer Einrichtung Patienten mit biallelischen RPE65-Mutationen?**

*Entsprechendes bitte auswählen.*

- Ja
- Nein

*Wenn **Nein** → direkt Beendigung.*

---

**55**

**Wie viele Patienten mit RPE65-Mutationen betreut Ihre Einrichtung insgesamt?**

Entsprechendes bitte auswählen.

- 0
  - 1-5
  - 6-10
  - 11-20
  - 21-25
  - 26-30
  - 31-35
  - $\geq 35$
  - Weiß nicht
- 

56

**Wie viele Patienten mit homozygoten Klasse 4 (wahrscheinlich pathogen) oder Klasse 5 (sicher pathogen) RPE65-Mutationen betreut Ihre Einrichtung?**

Entsprechendes bitte auswählen.

- 0
  - 1-5
  - 6-10
  - 11-20
  - >20
  - Weiß nicht
- 

57

**Wie viele Patienten mit compound heterozygoten Klasse 4 (wahrscheinlich pathogen) oder Klasse 5 (sicher pathogen) RPE65-Mutationen betreut Ihre Einrichtung?**

Entsprechendes bitte auswählen.

- 0
  - 1-5
  - 6-10
  - 11-20
  - >20
  - Weiß nicht
- 

58

**Wie viele Patienten mit homozygoten oder compound heterozygoten Klasse 3 (Variante unklarer klinischer Signifikanz) RPE65-Mutationen zumindest auf einem Allel und deutlich ausgeprägtem Phänotyp betreut Ihre Einrichtung?**

Entsprechendes bitte auswählen.

- 0



- 1-5
  - 6-10
  - 11-20
  - >20
  - Weiß nicht
- 

59

**Werden Patienten mit RPE65-Mangel auch von anderen Einrichtungen betreut?**

*Entsprechendes bitte auswählen.*

- Ja
  - Nein
  - Weiß nicht
- 

60

**Welche Methode nutzen Sie zur Testung des Farbsehens bei Patienten mit biallelischen Mutationen im RPE65-Gen?**

*Entsprechendes bitte auswählen (Mehrfachauswahl).*

- Farnsworth Panel D15
  - Lanthony Panel D15
  - Ishihara Karten
  - Anomaloskop
  - Andere: Bitte geben Sie die Art der Testung an.
  - Weiß nicht
- 

61

**Führen Sie Full Field Stimulus Threshold (FST)-Untersuchungen bei RPE65-Patienten durch?**

*Entsprechendes bitte auswählen.*

- Ja
- Nein
- Weiß nicht

*Wenn **Ja** → Frage 62 des Fragebogens beantworten (sonst überspringen)*

---

62

**Welche Art der Full Field Threshold (FST)-Untersuchung führen Sie durch?**

*Entsprechendes bitte auswählen.*

- Nur Weiß
- Blau, Rot

- Blau, Rot, Weiß
- 

**63**

**Führen Sie Pupillometrie-Untersuchungen bei Ihren RPE65-Patienten durch?**

Entsprechendes bitte auswählen.

- Ja
  - Nein
  - Weiß nicht
- 

**64**

**Haben Sie bereits Patienten mit biallelischen RPE65-Mutationen mit Voretigen Neparvovec behandelt (Luxturna™)?**

Entsprechendes bitte auswählen.

- Ja
- Nein

Wenn **Ja** → Frage 65,66,67 des Fragebogens beantworten (sonst überspringen)

Wenn **Nein** → zu Frage 68 des Fragebogens gehen (sonst überspringen)

---

**65**

**Wie viele Patienten haben Sie bereits behandelt?**

Entsprechendes bitte auswählen.

- 1-2
  - 3-5
  - 6-8
  - 9-11
  - ≥12
  - Weiß nicht
  - Keine Angaben
- 

**66**

**Wie viele der behandelten Patienten wiesen zumindest auf einem Allel eine Klasse 3 RPE65-Mutation auf?**

Entsprechendes bitte auswählen.

- 0
- 1-2
- 3-5

- 6-8
- 9-11
- $\geq 12$

Wenn **alles außer 0** → Frage 67 des Fragebogens beantworten (sonst überspringen)

---

**67**

**In welchen Situationen wurden Patienten mit Klasse 3 RPE65-Mutationen behandelt?**

*Entsprechendes bitte auswählen (Mehrfachauswahl)*

- Klasse 3 Mutationen auf einem Allel in Kombination mit Klasse 4 oder 5 Mutationen am anderen Allel
  - Klasse 3 Mutationen auf beiden Allelen, aber eindeutiger Phänotyp mit stark eingeschränkter Stäbchenfunktion sowie fortschreitenden OCT- und GF-Veränderungen
  - Weiß nicht
- 

**68**

**Überweisen Sie Patienten in ein anderes Zentrum?**

*Entsprechendes bitte auswählen.*

- Ja
- Nein
- Weiß nicht

Wenn **Nein** oder **Weiß nicht** oder **Überspringen** → Frage 69 des Fragebogens beantworten (sonst überspringen)

---

**69**

**Wieso werden die Patienten nicht behandelt?**

*Entsprechendes bitte auswählen (Mehrfachauswahl).*

- Alter <3 Jahre
- Krankheit ist zu weit fortgeschritten
- Krankheit nur mild ausgeprägt
- Keine Klasse 4 oder Klasse 5 Mutationen auf beiden Allelen
- Derzeit von Patienten nicht gewünscht
- Weiß nicht

**Abbildung S2. Spezielle Diagnostik und Betroffene mit RPE65-IRD**

- a. Diagnostik, bei Verdacht auf IRD in den verschiedenen Einrichtungen, FST: Full-Stimulus-Threshold-Test nach Dunkeladaptation, SD-OCT: Spektrale-optische-Kohärenztomografie, SS-OCT: Swept-Source-optische-Kohärenztomografie, Andere: weitere durchgeführte Diagnostika.
- b. Betreuung Betroffener mit IRD aufgrund biallelischer Mutationen im RPE65- Gen (RPE65-IRD).

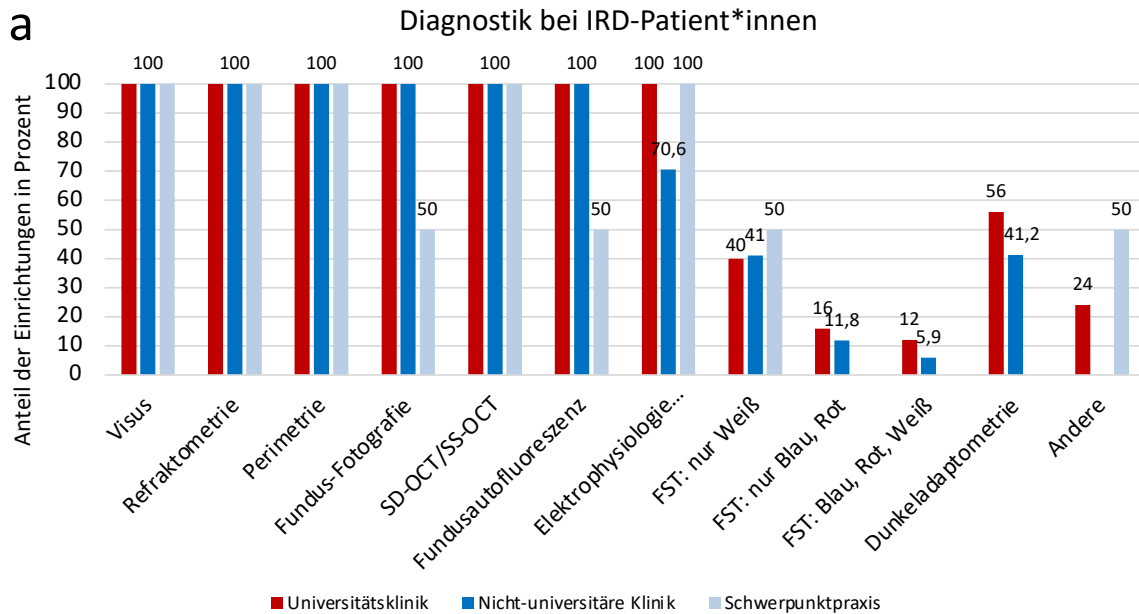

Stichprobengröße: Universitätsklinik n = 25, nicht-universitäre Klinik: n = 17, Schwerpunktpraxis: n = 2.

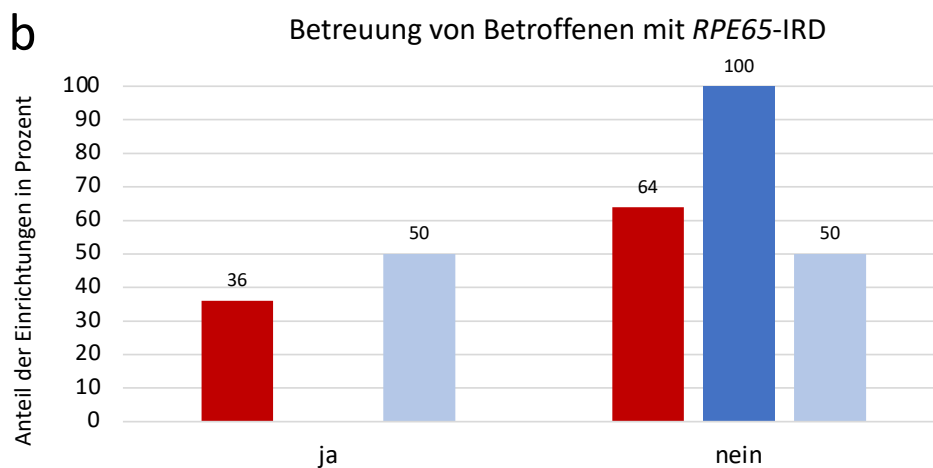

Stichprobengröße: Universitätsklinik n = 25, nicht-universitäre Klinik: n = 17, Schwerpunktpraxis: n = 2.

**Abbildung S3. Ophthalmogenetische Fortbildungsveranstaltungen**

Andere: andere/weitere besuchte Fortbildungsveranstaltungen.

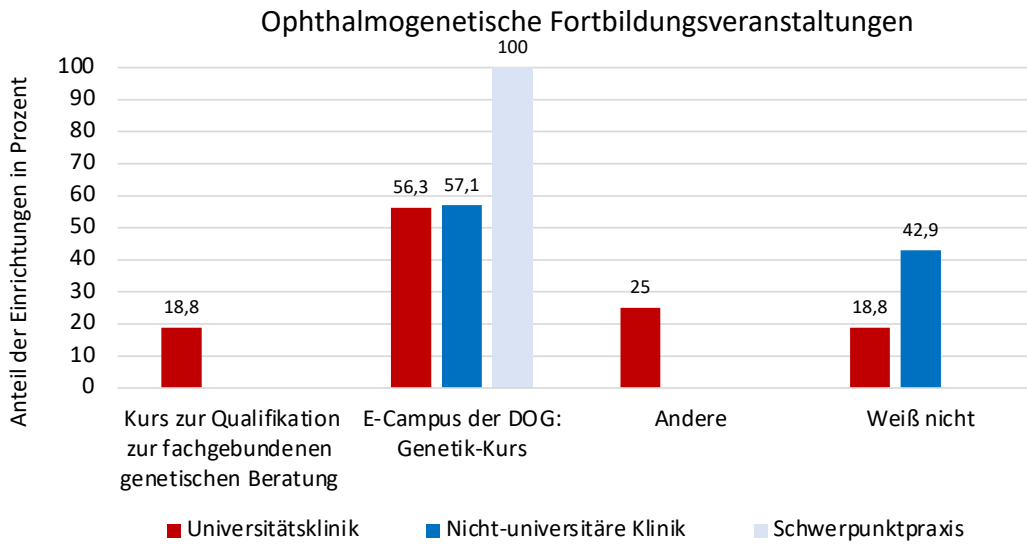

Stichprobengröße: Universitätsklinik: n = 16, nicht-universitäre Klinik: n = 7, Schwerpunktpraxis: n = 1.

**Abbildung S4. Studien zu IRDs**

a. Durchführung klinischer Studien zum natürlichen Verlauf von IRDs.

b. Teilnahme an gentherapeutischen Studien für IRDs.

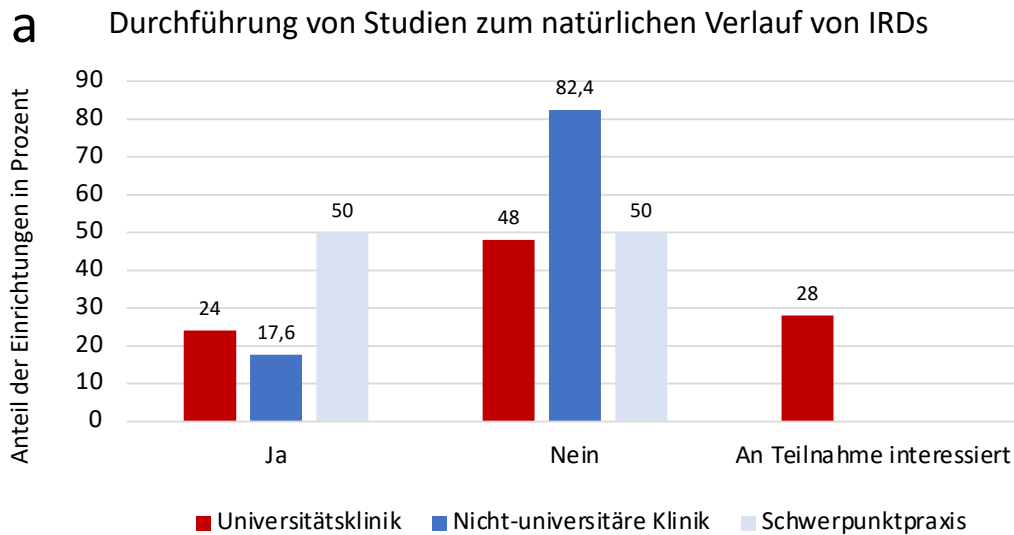

Stichprobengröße: Universitätsklinik: n = 25, nicht-universitäre Klinik: n = 17, Schwerpunktpraxis: n = 2.

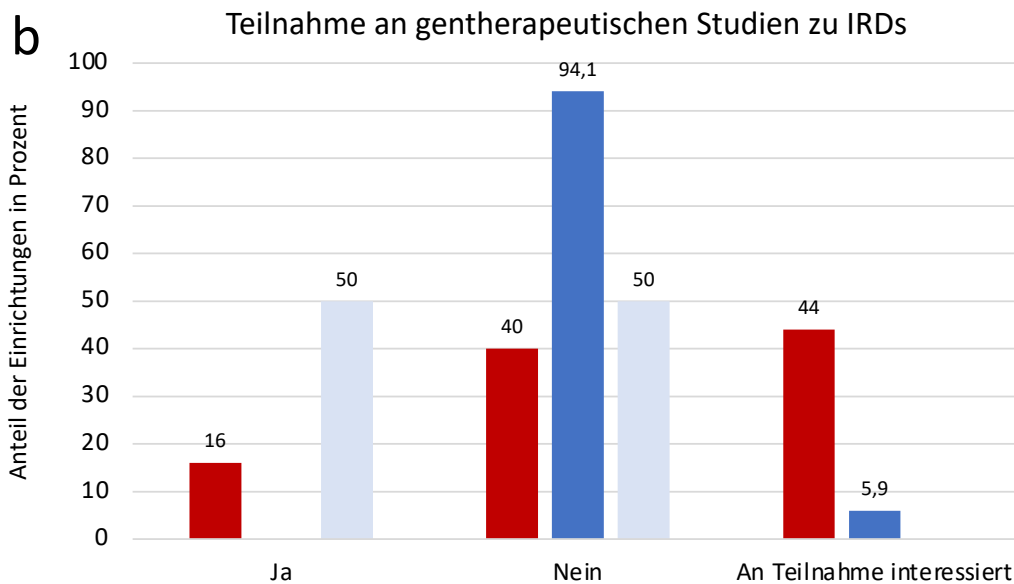

Stichprobengröße: Universitätsklinik: n = 25, nicht-universitäre Klinik: n = 17, Schwerpunktpraxis: n = 2.
